# Supplementary material for: Using factor analysis to evaluate health related quality of life among patients with Kashin-Beck diseaase in Shaanxi provience, China
Source: Research Square preprint supplement (doi:10.21203/rs.3.rs-3004351/v1), 2023-06-05
Supplement: Supplementary file 1 [file 3581598057d9f903efcd2919.xlsx]

## Sheet: Sheet2
TableS1:Distribution of characteristics of KBD patients in different districts/counties[n(%)]
Factor	Group	Baota	Bin	Chunhua	Fuping	Hua	Huang	Linyou	Yao	Yongshou	Changwu
Age	＜50	1(2.4)	21(17.5)	10(6.8)	3(10.7)	2(7.4)	1(1.7)	16(13.4)	13(10.8)	4(2.7)	23(15.3)
	50-55	2(4.8)	31(25.8)	26(17.6)	5(17.9)	4(14.8)	5(8.3)	16(13.4)	13(10.8)	20(13.3)	22(14.7）
	55-60	10(23.8)	23(19.2)	30(20.3)	6(21.4)	5(18.5)	9(15.0)	28(23.5)	22(18.3)	26(17.3)	37(24.7)
	60-65	9(21.4)	21(17.5)	28(18.9)	7(25.0)	3(11.1)	5(8.3)	27(22.7)	24(20.0)	41(27.3)	19(12.7)
	65-70	6(14.3)	16(13.3)	27(18.2)	4(14.3)	7(25.9）	11(18.3)	18(15.1)	29(24.2)	32(21.3)	29(19.3)
	70-75	5(11.9)	2(1.7)	18(12.2）	2(7.1)	0(0)	14(23.3)	6(5.0)	12(10.0)	19(12.7)	10(6.7)
	75-80	2(4.8)	3(2.5)	4(2.7)	1(3.6)	5(18.5)	8(13.3)	7(5.9)	4(3.3)	6(4.0)	6(4.0)
	＞80	7(16.7)	3(2.5)	5(3.4)	0(0)	1(3.7)	7(11.7)	1(0.8)	3(2.5)	2(1.3)	4(2.7)
Gender	Male	16(38.1)	64(53.3)	82(55.4)	14(50)	12(44.4)	21(35.0)	70(58.8)	65(54.2)	62(41.3)	78(52.0)
	Female	26(61.9)	56(46.7)	66(44.6)	14(50)	15(55.6)	39(65.0)	49(41.2)	55(45.8)	88(58.7)	72(48.0)
Education	Illiteracy	24(57.1)	39(32.5)	55(37.2)	8(28.6)	2(7.4)	19(31.7)	20(16.8)	39(32.5)	86(57.3)	59(39.3)
	Primary	16(38.1)	61(50.8)	46(31.1)	16(57.1)	17(63.0)	26(43.3)	74(62.2)	49(40.8)	40(26.7)	36(24.0)
	Junior or above	2(4.8)	20(16.7)	47(31.8)	4(14.3)	8(29.6)	15(25.0）	25(21.0)	32(26.7)	24(16.0)	55(36.7)
Marital status	Unmarried	0(0)	6(5.0)	7(4.7)	1(3.6)	0(0)	0(0)	12(10.1)	13(10.8)	3(2.0)	6(4.0)
	Married	34(81.0)	108(90.0)	126(85.1)	24(85.7)	25(92.6)	35(58.3)	89(74.8)	97(80.8)	122(81.3)	141(94.0)
	Divorced	2(4.8)	1(0.8)	1(0.7)	0(0)	0(0)	2(3.3)	3(2.5)	1(0.8)	1(0.7)	0(0)
	Widowed	6(14.3)	5(4.2)	14(9.5)	3(10.7)	2(7.4)	23(38.3)	15(12.6)	9(7.5)	24(16.0)	3(2.0)
Clinical grade	Ⅰ	15(35.7)	41(34.2)	50(33.8)	10(35.7)	10(37.0)	20(33.3)	43(36.1)	43(35.8)	100(66.7)	99(66.0)
	Ⅱ	13(31.0)	41(34.2)	49(33.1)	10(35.7)	9(33.3)	21(35.0)	43(36.1)	38(31.7)	50(33.3)	49(32.7)
	Ⅲ	14(33.3)	38(31.7)	49(33.1)	8(28.6)	8(29.6)	19(31.7)	33(27.7)	39(32.5)	0(0)	2(1.3)
Annual household income	＜6000 RMB	16(38.1)	39(32.5)	99(66.9)	11(39.3)	9(33.3)	39(65.0)	47(39.5)	20(16.7)	4(2.7)	31(20.7)
	6000-12000 RMB	9(21.4)	38(31.7)	41(27.7)	10(35.7)	2(7.4)	8(13.3)	28(23.5)	27(22.5)	16(10.7)	52(34.7)
	12000-25000 RMB	7(16.7)	21(17.5)	4(2.7)	6(21.4)	3(11.1)	7(11.7)	18(15.1)	50(41.7)	25(16.7)	56(37.3)
	＞25000 RMB	10(23.8)	22(18.3)	4(2.7)	1(3.6)	13(48.1)	6(10.0）	26(21.8)	23(19.2)	105(70.0)	11(7.3)
