# Supplementary material for: Using factor analysis to evaluate health related quality of life among patients with Kashin-Beck diseaase in Shaanxi provience, China
Source: Research Square preprint supplement (doi:10.21203/rs.3.rs-3004351/v1), 2023-06-05
Supplement: Supplementary file 1 [file deac115a2ec1d9ea79333033.pdf]

**ID:**

**Subjects:**

1. KBD patients
2. Normal individuals

**Survey on Disease Burden Analysis of Kashin-Beck Disease in Shaanxi Province**

Excuse me. We are conducting a research survey on the disease burden of Kashin-Beck disease patients, in order to analyze the medical treatment policies and health resource allocation strategies for the Kashin-Beck disease population. This survey is conducted in a named format, and we will strictly protect your privacy. We hope to have your support and cooperation. We will also try to reflect the situation we have learned to relevant departments, hoping to help improve your life. Please carefully answer and fill out the following questions, and write the answers in the blank space after the question.

**Name:**

**Telephone:**

**Address:**

City:

Country(District):

**Survey Results:**

1. Completed
2. Partially Completed
3. Refused
4. Others, explain the reason:

**Investigator's Signature:**

**Quality control personnel's signature:**

**Date:**

**Date:**

**Shaanxi Provincial Institute for Enndemic Disease Control**

**2019 March**

| Personal information                                                                                                                             |                                                                                                                                                                                                                                                                        | Answer |
|--------------------------------------------------------------------------------------------------------------------------------------------------|------------------------------------------------------------------------------------------------------------------------------------------------------------------------------------------------------------------------------------------------------------------------|--------|
| <b>A1</b>                                                                                                                                        | <b>Gender:</b><br>1. Male<br>2. Female                                                                                                                                                                                                                                 |        |
| <b>A2</b>                                                                                                                                        | <b>Ethnicity:</b><br>1. Han<br>2. Hui<br>3. Others, remark                                                                                                                                                                                                             |        |
| <b>A3</b>                                                                                                                                        | <b>Date of birth:</b>                                                                                                                                                                                                                                                  |        |
| <b>A4</b>                                                                                                                                        | <b>Education level:</b><br>1. Illiteracy<br>2. Primary<br>3. Junior or above                                                                                                                                                                                           |        |
| <b>A5</b>                                                                                                                                        | <b>Marital status:</b><br>1. Unmarried<br>2. Married<br>3. Divorced<br>4. Widowed                                                                                                                                                                                      |        |
| <b>A6</b>                                                                                                                                        | <b>Occupation:</b><br>1. Farmer<br>2. Others                                                                                                                                                                                                                           |        |
| <b>A7</b>                                                                                                                                        | <b>Clinical grading of Kashin-Beck disease:</b><br>1. Grade I<br>2. Grade II<br>3. Grade III                                                                                                                                                                           |        |
| <b>A8</b>                                                                                                                                        | <b>Annual household income: (RMB)</b>                                                                                                                                                                                                                                  |        |
| <b>SF-36 Questionnaire</b>                                                                                                                       |                                                                                                                                                                                                                                                                        |        |
| <b>B1</b>                                                                                                                                        | <b>In general, would you say your health is:</b><br>1. Excellent<br>2. Very good<br>3. Good<br>4. Fair<br>5. Poor                                                                                                                                                      |        |
| <b>B2</b>                                                                                                                                        | <b>Compared to one year ago, how could you rate your health in general now?</b><br>1. Much better now than one year ago<br>2. Somewhat better now than one year ago<br>3. About the same<br>4. Somewhat worse now than one year ago<br>5. Much worse than one year ago |        |
| The following items are about activities you might do during a typical day. Does your health now limit you in these activities? If so, how much? |                                                                                                                                                                                                                                                                        |        |
| <b>B3</b>                                                                                                                                        | <b>Vigorous activities, such as running, lifting heavy objects, participating in strenuous sports</b><br>1. Yes, Limited a lot                                                                                                                                         |        |

|                                                                                                                                                                  |                                                                                                                                                                                                                                                            |  |
|------------------------------------------------------------------------------------------------------------------------------------------------------------------|------------------------------------------------------------------------------------------------------------------------------------------------------------------------------------------------------------------------------------------------------------|--|
|                                                                                                                                                                  | <ul style="list-style-type: none"> <li>2. Yes, Limited a little</li> <li>3. No, Not limited at all</li> </ul>                                                                                                                                              |  |
| <b>B4</b>                                                                                                                                                        | <p><b>Moderate activities, such as moving a table, pushing a vacuum cleaner, bowling, or playing golf</b></p> <ul style="list-style-type: none"> <li>1. Yes, Limited a lot</li> <li>2. Yes, Limited a little</li> <li>3. No, Not limited at all</li> </ul> |  |
| <b>B5</b>                                                                                                                                                        | <p><b>Lifting or carrying groceries</b></p> <ul style="list-style-type: none"> <li>1. Yes, Limited a lot</li> <li>2. Yes, Limited a little</li> <li>3. No, Not limited at all</li> </ul>                                                                   |  |
| <b>B6</b>                                                                                                                                                        | <p><b>Climbing several flights of stairs</b></p> <ul style="list-style-type: none"> <li>1. Yes, Limited a lot</li> <li>2. Yes, Limited a little</li> <li>3. No, Not limited at all</li> </ul>                                                              |  |
| <b>B7</b>                                                                                                                                                        | <p><b>Climbing one flights of stairs</b></p> <ul style="list-style-type: none"> <li>1. Yes, Limited a lot</li> <li>2. Yes, Limited a little</li> <li>3. No, Not limited at all</li> </ul>                                                                  |  |
| <b>B8</b>                                                                                                                                                        | <p><b>Bending, kneeling, or stooping</b></p> <ul style="list-style-type: none"> <li>1. Yes, Limited a lot</li> <li>2. Yes, Limited a little</li> <li>3. No, Not limited at all</li> </ul>                                                                  |  |
| <b>B9</b>                                                                                                                                                        | <p><b>Walking more than a mile</b></p> <ul style="list-style-type: none"> <li>1. Yes, Limited a lot</li> <li>2. Yes, Limited a little</li> <li>3. No, Not limited at all</li> </ul>                                                                        |  |
| <b>B10</b>                                                                                                                                                       | <p><b>Walking several blocks</b></p> <ul style="list-style-type: none"> <li>1. Yes, Limited a lot</li> <li>2. Yes, Limited a little</li> <li>3. No, Not limited at all</li> </ul>                                                                          |  |
| <b>B11</b>                                                                                                                                                       | <p><b>Walking one block</b></p> <ul style="list-style-type: none"> <li>1. Yes, Limited a lot</li> <li>2. Yes, Limited a little</li> <li>3. No, Not limited at all</li> </ul>                                                                               |  |
| <b>B12</b>                                                                                                                                                       | <p><b>Bathing or dressing yourself</b></p> <ul style="list-style-type: none"> <li>1. Yes, Limited a lot</li> <li>2. Yes, Limited a little</li> <li>3. No, Not limited at all</li> </ul>                                                                    |  |
| <p>During the past 4 weeks, have you had any of the following problems with your work or other regular daily activities as a result of your physical health?</p> |                                                                                                                                                                                                                                                            |  |
| <b>B13</b>                                                                                                                                                       | <p><b>Cut down the amount of time you spend on work or other activities</b></p> <ul style="list-style-type: none"> <li>1. Yes</li> </ul>                                                                                                                   |  |

|                                                                                                                                                                                                    |                                                                                                                                                                                                                                |  |
|----------------------------------------------------------------------------------------------------------------------------------------------------------------------------------------------------|--------------------------------------------------------------------------------------------------------------------------------------------------------------------------------------------------------------------------------|--|
|                                                                                                                                                                                                    | 2. No                                                                                                                                                                                                                          |  |
| <b>B14</b>                                                                                                                                                                                         | <b>Accomplished less than you would like</b><br>1. Yes<br>2. No                                                                                                                                                                |  |
| <b>B15</b>                                                                                                                                                                                         | <b>Were limited in the kind of work or other activities</b><br>1. Yes<br>2. No                                                                                                                                                 |  |
| <b>B16</b>                                                                                                                                                                                         | <b>Had difficulty performing the work or other activities (for example, it took extra effort)</b><br>1. Yes<br>2. No                                                                                                           |  |
| During the past 4 weeks, have you had any of the following problems with your work or other regular daily activities as a result of any emotional problems (such as feeling depressed or anxious)? |                                                                                                                                                                                                                                |  |
| <b>B17</b>                                                                                                                                                                                         | <b>Cut down the amount of time you spend on work or other activities</b><br>1. Yes<br>2. No                                                                                                                                    |  |
| <b>B18</b>                                                                                                                                                                                         | <b>Accomplished less than you would like</b><br>1. Yes<br>2. No                                                                                                                                                                |  |
| <b>B19</b>                                                                                                                                                                                         | <b>Didn't do work or other activities as carefully as usual</b><br>1. Yes<br>2. No                                                                                                                                             |  |
| <b>B20</b>                                                                                                                                                                                         | <b>Emotional problems interfered with your normal social activities with family, friends, neighbors, or groups</b><br>1. Not at all<br>2. Slightly<br>3. Moderately<br>4. Severe<br>5. Very Severe                             |  |
| <b>B21</b>                                                                                                                                                                                         | <b>How much bodily pain have you had during the past 4 weeks?</b><br>1. None<br>2. Mild<br>3. Moderate<br>4. Severe<br>5. Very Severe                                                                                          |  |
| <b>B22</b>                                                                                                                                                                                         | <b>During the past 4 weeks, how much did pain interfere with your normal work (including both work outside the home and housework)?</b><br>1. Not at all<br>2. A little bit<br>3. Moderately<br>4. Quite a bit<br>5. Extremely |  |
| These questions are about how you feel and how things have been with you during the last 4 weeks.                                                                                                  |                                                                                                                                                                                                                                |  |

For each question, please give the answer that comes closest to the way you have been feeling.

|            |                                                                                                                                                                                                                           |  |
|------------|---------------------------------------------------------------------------------------------------------------------------------------------------------------------------------------------------------------------------|--|
| <b>B23</b> | <b>Did you feel of pep?</b><br>1. All of the time<br>2. Most of the time<br>3. A good bit of time<br>4. Some of the time<br>5. A little bit of time<br>6. None of the time                                                |  |
| <b>B24</b> | <b>Have you been a very nervous person?</b><br>1. All of the time<br>2. Most of the time<br>3. A good bit of time<br>4. Some of the time<br>5. A little bit of time<br>6. None of the time                                |  |
| <b>B25</b> | <b>Have you felt so down in the dumps that nothing could cheer you up?</b><br>1. All of the time<br>2. Most of the time<br>3. A good bit of time<br>4. Some of the time<br>5. A little bit of time<br>6. None of the time |  |
| <b>B26</b> | <b>Have you feel calm and peaceful?</b><br>1. All of the time<br>2. Most of the time<br>3. A good bit of time<br>4. Some of the time<br>5. A little bit of time<br>6. None of the time                                    |  |
| <b>B27</b> | <b>Did you have a lot of energy?</b><br>1. All of the time<br>2. Most of the time<br>3. A good bit of time<br>4. Some of the time<br>5. A little bit of time<br>6. None of the time                                       |  |
| <b>B28</b> | <b>Have you felt downhearted and blue?</b><br>1. All of the time<br>2. Most of the time<br>3. A good bit of time<br>4. Some of the time<br>5. A little bit of time<br>6. None of the time                                 |  |

|                                                                |                                                                                                                                                                                                                                                                                                                                          |  |
|----------------------------------------------------------------|------------------------------------------------------------------------------------------------------------------------------------------------------------------------------------------------------------------------------------------------------------------------------------------------------------------------------------------|--|
| <b>B29</b>                                                     | <b>Did you feel worn out?</b><br>1. All of the time<br>2. Most of the time<br>3. A good bit of time<br>4. Some of the time<br>5. A little bit of time<br>6. None of the time                                                                                                                                                             |  |
| <b>B30</b>                                                     | <b>Have been a happy person?</b><br>1. All of the time<br>2. Most of the time<br>3. A good bit of time<br>4. Some of the time<br>5. A little bit of time<br>6. None of the time                                                                                                                                                          |  |
| <b>B31</b>                                                     | <b>Did you feel tired?</b><br>1. All of the time<br>2. Most of the time<br>3. A good bit of time<br>4. Some of the time<br>5. A little bit of time<br>6. None of the time                                                                                                                                                                |  |
| <b>B32</b>                                                     | <b>During the past 4 weeks, how much of the time has your physical health or emotional problems interfered with your social activities (like visiting with friends, relatives, etc.)?</b><br>1. All of the time<br>2. Most of the time<br>3. A good bit of time<br>4. Some of the time<br>5. A little bit of time<br>6. None of the time |  |
| How true or false is each of the following statements for you? |                                                                                                                                                                                                                                                                                                                                          |  |
| <b>B33</b>                                                     | <b>I seem to get sick a little easier than other people</b><br>1. Definitely true<br>2. Mostly true<br>3. Don't know<br>4. Mostly false<br>5. Definitely false                                                                                                                                                                           |  |
| <b>B34</b>                                                     | <b>I am as healthy as anybody I know</b><br>1. Definitely true<br>2. Mostly true<br>3. Don't know<br>4. Mostly false<br>5. Definitely false                                                                                                                                                                                              |  |
| <b>B35</b>                                                     | <b>:I expect my health to get worse</b>                                                                                                                                                                                                                                                                                                  |  |

|            |                                                                                                                                                                                                      |  |
|------------|------------------------------------------------------------------------------------------------------------------------------------------------------------------------------------------------------|--|
|            | <ol style="list-style-type: none"><li>1. Definitely true</li><li>2. Mostly true</li><li>3. Don't know</li><li>4. Mostly false</li><li>5. Definitely false</li></ol>                                  |  |
| <b>B36</b> | <b>My health is excellent</b><br><ol style="list-style-type: none"><li>1. Definitely true</li><li>2. Mostly true</li><li>3. Don't know</li><li>4. Mostly false</li><li>5. Definitely false</li></ol> |  |
